# Supplementary material for: Exploring the Spatial Relationship between the Ecological Topological Network and Carbon Sequestration Capacity of Coastal Urban Ecosystems: A Case Study of Yancheng City, China
Source: MDPI journal article supplement (doi:10.3390/rs15164007), 2023-08-12
Supplement: s1 [file s1]

Archive with 1 entries (1 files):
- remotesensing-2475463-supplementary.pdf
