# Supplementary material for: Exploring the Spatial Relationship between the Ecological Topological Network and Carbon Sequestration Capacity of Coastal Urban Ecosystems: A Case Study of Yancheng City, China
Source: MDPI journal article supplement (doi:10.3390/rs15164007), 2023-08-12
Supplement: s1 [file s1 › remotesensing-2475463-supplementary.pdf]

*Supplementary Materials*

# **Exploring the Spatial Relationship between the Ecological Topological Network and Carbon Sequestration Capacity of Coastal Urban Ecosystems: A Case Study of Yancheng City, China**

**Nanyan Zhu <sup>1</sup>, Jingwen Ai <sup>2</sup>, Zhen Zeng <sup>2</sup> and Chunhua Zhou <sup>1,3,\*</sup>**

<sup>1</sup> College of Animal Science and Technology, Yangzhou University, Yangzhou 225000, China; dx120200148@stu.yzu.edu.cn

<sup>2</sup> College of Landscape Architecture, Fujian Agriculture and Forestry University, Fuzhou 350002, China; 2191775006@fafu.edu.cn (J.A.); 2191775005@fafu.edu.cn (Z.Z.)

<sup>3</sup> College of Horticulture and Landscape Architecture, Yangzhou University, Yangzhou 225000, China

\* Correspondence: chzhou@yzu.edu.cn; Tel.: +86-17851971285

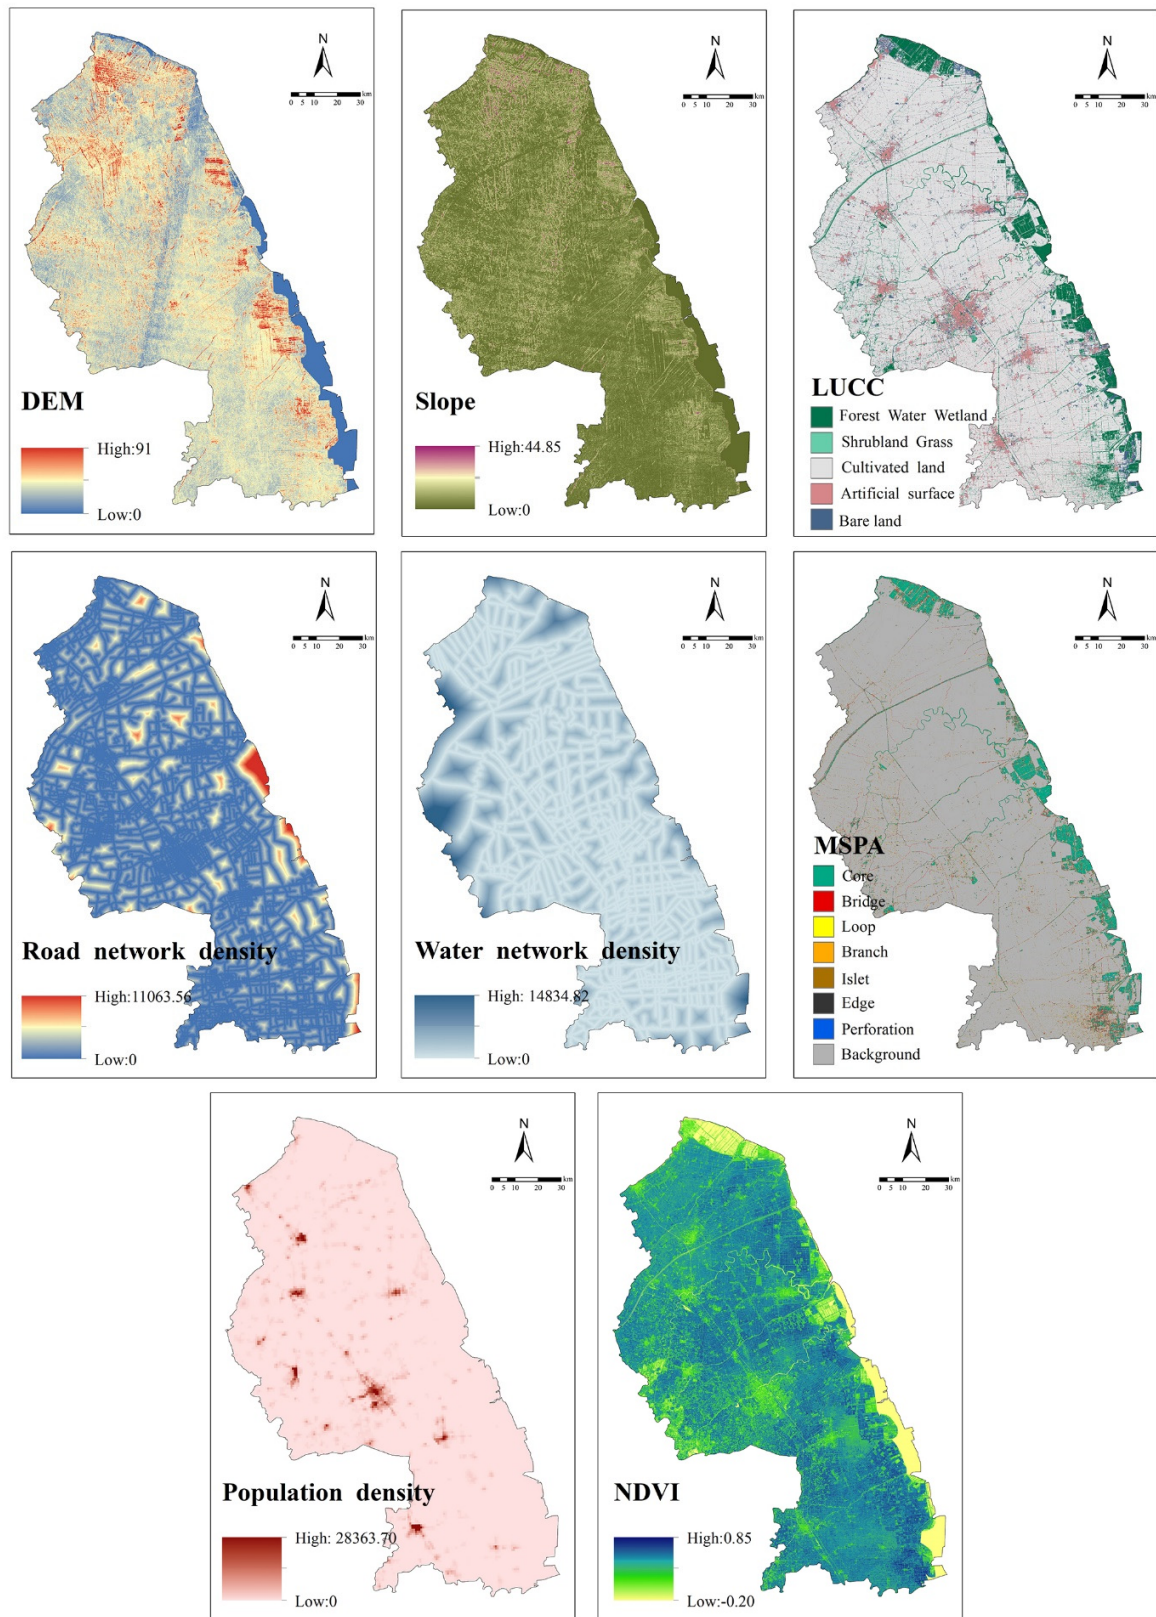

**Figure S1.** Results of front resistance surfaces.

**Table S1.** Definition and ecological implication of landscape types in MSPA.

| <b>Landscape Type</b> | <b>Definition</b>                                                                                               | <b>Ecological Implication</b>                                                                                                                                                                                                                                                                                  |
|-----------------------|-----------------------------------------------------------------------------------------------------------------|----------------------------------------------------------------------------------------------------------------------------------------------------------------------------------------------------------------------------------------------------------------------------------------------------------------|
| Core                  | The set of foreground pixels whose area is greater than the specified threshold.                                | The core is a spatially distinguishable nonlinear large natural patch that can be distinguished as the 'source' of various ecological processes, which is of great significance for the protection of biodiversity. It is usually identified as ecological source in the study of ecological network.          |
| Bridge                | Long-narrow patch with at least two points connected to different cores.                                        | Bridge is a narrow area between connected cores, which is a channel for species migration and energy exchange between regions.                                                                                                                                                                                 |
| Loop                  | Long-narrow patch with at least 2 points connected to the same core.                                            | Loop is a channel that connects to the same core. As a shortcut for material flow in the same area, loop is small in scale and has low connection with the surrounding natural plaques.                                                                                                                        |
| Branch                | Long-narrow patch with only one side connected to another type of plaque.                                       | Branch is an ecological patch that has only one section of connection with other ecological regions.                                                                                                                                                                                                           |
| Islet                 | The patch that is not connected to any other foreground areas, and the area is less than the threshold of core. | Islet is an isolated, fragmented small natural patch that is clearly distinct from the surrounding landscape elements and is not connected to each other. It is often difficult to communicate with surrounding patches. However, as a small green space in the built area, it has great ecological potential. |
| Edge                  | The outer edge transition zone of the set of foreground pixels.                                                 | Edge is the transition zone between the core and the non-core area, which has the edge effect. Adjacent patches penetrate, connect and distinguish each other through edge, so it has characteristics of both itself and adjacent patches.                                                                     |
| Perforation           | The internal edge transition zone of the set of foreground pixels.                                              | Perforation is a transition zone between the non-core area within core. Similar to Edge, it also has an edge effect.                                                                                                                                                                                           |

**Table S2.** Expert rating of resistance factors based on the AHP.

| Resistance<br>Factor                  | EXPERT |        |        |        |        |        |        |        |        |        | Average |
|---------------------------------------|--------|--------|--------|--------|--------|--------|--------|--------|--------|--------|---------|
|                                       | 1      | 2      | 3      | 4      | 5      | 6      | 7      | 8      | 9      | 10     |         |
| DEM                                   | 0.1283 | 0.1869 | 0.1556 | 0.0689 | 0.0808 | 0.1211 | 0.1248 | 0.1070 | 0.1336 | 0.1186 | 0.1243  |
| Slope                                 | 0.0497 | 0.0769 | 0.0508 | 0.0608 | 0.0600 | 0.0867 | 0.0724 | 0.0923 | 0.0741 | 0.0672 | 0.0713  |
| LULC                                  | 0.2208 | 0.1414 | 0.2781 | 0.2837 | 0.1719 | 0.1781 | 0.1580 | 0.1670 | 0.1445 | 0.2697 | 0.2110  |
| NDVI                                  | 0.1118 | 0.1241 | 0.0893 | 0.1135 | 0.1494 | 0.0968 | 0.1690 | 0.1056 | 0.1099 | 0.1083 | 0.1121  |
| MSPA                                  | 0.1696 | 0.1543 | 0.1731 | 0.1844 | 0.2105 | 0.1569 | 0.1285 | 0.1959 | 0.2129 | 0.1460 | 0.1762  |
| Population<br>density                 | 0.1440 | 0.1021 | 0.0973 | 0.0934 | 0.1298 | 0.1633 | 0.1583 | 0.1500 | 0.0970 | 0.0726 | 0.1167  |
| Distance from<br>water network        | 0.0957 | 0.0999 | 0.0968 | 0.1051 | 0.1140 | 0.0866 | 0.0942 | 0.0737 | 0.0965 | 0.0893 | 0.0931  |
| Distance from<br>main road<br>network | 0.0800 | 0.1145 | 0.0591 | 0.0902 | 0.0837 | 0.1104 | 0.0947 | 0.1085 | 0.1316 | 0.1283 | 0.1023  |

Table S3

Comprehensive resistance evaluation index system.

| Resistance Factor    | Weight | Value | Classification Index | Factor                                         | Weight | Value | Classification Index   |
|----------------------|--------|-------|----------------------|------------------------------------------------|--------|-------|------------------------|
| <sup>a</sup> DEM/m   | 0.12   | 1     | 0-4                  | LULC                                           | 0.21   | 1     | Forest, Water, Wetland |
|                      |        | 20    | 4-8                  |                                                |        | 20    | Shrub, Grass           |
|                      |        | 60    | 8-12                 |                                                |        | 60    | Cultivated land        |
|                      |        | 80    | 12-19                |                                                |        | 80    | Artificial surface     |
|                      |        | 100   | 19-91                |                                                |        | 100   | Bare land              |
| <sup>a</sup> Slope/° | 0.07   | 1     | 0-1.11               | <sup>a</sup> Population density                | 0.12   | 1     | 0-667                  |
|                      |        | 20    | 1.11-2.30            |                                                |        | 20    | 667-2892               |
|                      |        | 60    | 2.30-3.97            |                                                |        | 60    | 2892-7786              |
|                      |        | 80    | 3.97-7.67            |                                                |        | 80    | 7786-15572             |
|                      |        | 100   | 7.67-44.85           |                                                |        | 100   | 15572-28364            |
| <sup>a</sup> NDVI/%  | 0.11   | 1     | 55.72-84.94          | <sup>b</sup> Distance from water network/m     | 0.09   | 100   | <100                   |
|                      |        | 20    | 43.38-55.72          |                                                |        | 80    | 100-500                |
|                      |        | 60    | 26.50-43.38          |                                                |        | 60    | 500-1000               |
|                      |        | 80    | -0.25-26.50          |                                                |        | 20    | 1000-1500              |
|                      |        | 100   | -20.00—0.25          |                                                |        | 1     | ≥1500                  |
| MSPA                 | 0.18   | 5     | Core                 | <sup>b</sup> Distance from main road network/m | 0.10   | 100   | ≥2000                  |
|                      |        | 10    | Bridge               |                                                |        | 80    | 1500-2000              |
|                      |        | 30    | Loop                 |                                                |        | 60    | 1000-1500              |
|                      |        | 40    | Branch               |                                                |        | 20    | 500-1000               |
|                      |        | 50    | Islet                |                                                |        | 1     | <500                   |
|                      |        | 60    | Edge                 |                                                |        |       |                        |
|                      |        | 70    | Perforation          |                                                |        |       |                        |
|                      |        | 100   | Background           |                                                |        |       |                        |

Note: Different lowercase letters indicate different grading methods. *a* represents the natural interrupt method, which determines the cutoff value by minimizing the intra-class variance and maximizing the inter-class variance in the iterative calculation; *b* indicates that the isometric method divides the range of attribute values into subranges of equal size.

**Table S4.** Description of the topological indicators

| Type of Indicator                                  | Name of Indicator              | Significance of Indicator                                                                                                                        | Ecological Implications in the Ecological Network                                                                                                                               |
|----------------------------------------------------|--------------------------------|--------------------------------------------------------------------------------------------------------------------------------------------------|---------------------------------------------------------------------------------------------------------------------------------------------------------------------------------|
| Evaluation of the overall structure of the network | Average degree                 | Average of the degrees of all ecological nodes in the network                                                                                    | Evaluates the average connectivity of all sources and nodes in the network                                                                                                      |
|                                                    | Average clustering coefficient | Average of the clustering coefficients of all nodes in the network                                                                               | Indicates whether the distribution of ecological nodes in the network tends to be concentrated or decentralized                                                                 |
|                                                    | Modularity                     | Each ecological node in the network is assigned to a different community                                                                         | Evaluates the effect of network community division                                                                                                                              |
| Evaluation of nodes of the network                 | Degree                         | The number of corridors owned by a node                                                                                                          | The number of ecological corridors owned by an ecological source or a node                                                                                                      |
|                                                    | Betweenness centrality         | The normalized index of the proportion of all the shortest paths in the network that pass through a node                                         | Indicates the proportion or degree to which an ecological node exists on the shortest path of any two nodes in the network                                                      |
|                                                    | Closeness centrality           | The reciprocal of the sum of the shortest distances from a node to all other nodes multiplied by the number of other nodes                       | Indicates the distance between ecological node and other nodes through the shortest path; at the same time, quantifies the position of ecological nodes in the geometric center |
|                                                    | Clustering coefficient         | The ratio of the number of corridors actually existing between the neighboring nodes of a node to the maximum number of corridors that may exist | Indicates the proportion of connectivity between neighboring nodes                                                                                                              |
|                                                    | Eigenvector centrality         | Each node is assigned a relative score; connections to nodes with high scores are weighted more than connections to nodes with low scores        | The more important the node connected to node A, then the more important node A is; this indicator is used to evaluate the importance of nodes                                  |
|                                                    | PageRank                       | The importance of nodes                                                                                                                          | Rank of the importance of ecological nodes                                                                                                                                      |

**Table S5.** The description and calculation formulas of the robustness indicators

| Name of Indicator       | Significance of Indicator                                                                     | Ecological Implications in the Ecological Network                          | Calculation Formula                                               |
|-------------------------|-----------------------------------------------------------------------------------------------|----------------------------------------------------------------------------|-------------------------------------------------------------------|
| Average degree          | Average of the degrees of all ecological nodes in the network                                 | Evaluates the average connectivity of all sources and nodes in the network | $K = \frac{1}{n} \sum_{n=1}^n k_n$                                |
| Efficiency              | The shortest path between any two nodes in a network                                          | Represents the efficiency of energy flow between network nodes             | $E = \frac{1}{n(n-1)} \sum_{i=1}^n \sum_{j=1(i \neq j)}^n H_{ij}$ |
| Connectivity robustness | The relative size of the maximum connected subgraph during network fragmentation under attack | Directly reflects the extent of network damage                             | $G = \frac{P^*}{P}$                                               |

Note:  $K$  is the average degree,  $n$  is the number of nodes in the network,  $K_n$  is the degree of node  $n$ ,  $E$  is the efficiency of the network,  $H_{ij}$  is the reciprocal of the shortest path between nodes  $i$  and  $j$ ,  $G$  is the relative size of the maximum connected subgraph,  $P^*$  is the size of the maximum connected subgraph, and  $P$  is the size of the initial network connectivity.

**Table S6.** Interaction matrix based on the gravity model.

| Importance | Source<br>1 | Source<br>2 | Source<br>3 | Source<br>4 | Source<br>5 | Source<br>6 | Source<br>7 | Source<br>8 | Source<br>9 | Source<br>10 | Source<br>11 | Source<br>12 | Source<br>13 | Source<br>14 | Source<br>15 | Source<br>16 |
|------------|-------------|-------------|-------------|-------------|-------------|-------------|-------------|-------------|-------------|--------------|--------------|--------------|--------------|--------------|--------------|--------------|
| Source 1   | —           | 1.97        | 3.73        | 1.42        | 3.08        | 0.95        | 3.55        | 0.98        | 9.68        | 3.56         | 0.87         | 1.20         | 34.73        | 0.88         | 1.33         | 3.05         |
| Source 2   |             | —           | 17.41       | 65.65       | 33.38       | 11.17       | 3.20        | 15.31       | 5.19        | 21.55        | 9.79         | 3.37         | 0.85         | 11.00        | 10.70        | 1.39         |
| Source 3   |             |             | —           | 7.34        | 214.26      | 3.23        | 9.58        | 3.69        | 21.65       | 631.76       | 2.89         | 3.18         | 1.42         | 3.06         | 7.20         | 2.32         |
| Source 4   |             |             |             | —           | 11.03       | 28.35       | 1.93        | 50.82       | 3.07        | 8.56         | 24.14        | 2.41         | 0.64         | 29.44        | 6.26         | 1.00         |
| Source 5   |             |             |             |             | —           | 4.22        | 7.86        | 4.98        | 13.41       | 452.77       | 3.77         | 3.36         | 1.22         | 4.03         | 10.74        | 2.21         |
| Source 6   |             |             |             |             |             | —           | 1.09        | 182.55      | 1.71        | 3.62         | 313.69       | 1.49         | 0.45         | 325.45       | 3.11         | 0.68         |
| Source 7   |             |             |             |             |             |             | —           | 1.17        | 11.01       | 10.71        | 0.98         | 1.73         | 1.44         | 1.02         | 2.37         | 4.17         |
| Source 8   |             |             |             |             |             |             |             | —           | 1.88        | 4.24         | 195.17       | 1.70         | 0.46         | 397.51       | 3.85         | 0.74         |
| Source 9   |             |             |             |             |             |             |             |             | —           | 18.73        | 1.60         | 1.91         | 3.01         | 1.66         | 3.07         | 4.88         |
| Source 10  |             |             |             |             |             |             |             |             |             | —            | 3.35         | 3.79         | 1.43         | 3.56         | 9.81         | 2.75         |
| Source 11  |             |             |             |             |             |             |             |             |             |              | —            | 1.56         | 0.43         | 1278.40      | 3.35         | 0.70         |
| Source 12  |             |             |             |             |             |             |             |             |             |              |              | —            | 0.77         | 1.58         | 18.63        | 3.64         |
| Source 13  |             |             |             |             |             |             |             |             |             |              |              |              | —            | 0.46         | 0.83         | 2.24         |
| Source 14  |             |             |             |             |             |             |             |             |             |              |              |              |              | —            | 3.49         | 0.71         |
| Source 15  |             |             |             |             |             |             |             |             |             |              |              |              |              |              | —            | 3.21         |
| Source 16  |             |             |             |             |             |             |             |             |             |              |              |              |              |              |              | —            |

Note: Red, yellow and green respectively indicated that there may be common ecological corridors, secondary important ecological corridors, and important ecological corridors between two ecological sources.
